# Supplementary material
Source: PubMed Central journal article supplement (PMC9342685)
Supplement: ehp9985.smcontents.508.pdf [file ehp9985.smcontents.508.pdf]

**Note to readers with disabilities:** *EHP* strives to ensure that all journal content is accessible to all readers. However, some figures and Supplemental Material published in *EHP* articles may not conform to [508 standards](#) due to the complexity of the information being presented. If you need assistance accessing journal content, please contact [ehp508@niehs.nih.gov](mailto:ehp508@niehs.nih.gov). Our staff will work with you to assess and meet your accessibility needs within 3 working days.

### **Supplemental Material**

#### **Estimating National Exposures and Potential Bladder Cancer Cases Associated with Chlorination DBPs in U.S. Drinking Water**

Richard J. Weisman, Austin Heinrich, Frank Letkiewicz, Michael Messner, Kirsten Studer, Lili Wang, and Stig Regli

#### **Table of Contents**

**Additional Information About USEPA DBP Regulations.**

**National Cancer Institute Bladder Cancer Data Description.**

**Additional Information About Post-Stage 2 THM4 Concentration Estimates.**

**Table S1.** Additional information about number of THM4 records for 2011 in the third Six-Year Review (SYR3) occurrence dataset.

**Table S2.** Relative Difference in ICR Data Between States that Provided SYR3 THM4 Data vs. States that Did Not Provide SYR3 THM4 Data for Evaluation of Representativeness of THM4 Concentrations.

**R Script of Data and Equations for Figure #3 (R Core Team. 2017. R: A language and environment for statistical computing. R Foundation for Statistical Computing, Vienna, Austria. <https://www.R-project.org/>).**

**R Script for Deriving the Model Parameters (Limiting Slopes) Based on the Lower- and Upper- 95 Percent Confidence Interval Curves in Villanueva et al. (2004)**

#### **References**

**Additional File-** Excel Document
